# Supplementary material for: Whole-Exome Sequencing of Matched Primary and Metastatic Papillary Thyroid Cancer
Source: PubMed Central journal article supplement — Thyroid. 2020 Jan 21;30(1):42–56. doi: 10.1089/thy.2019.0052 (PMC6983753; doi:10.1089/thy.2019.0052), 2020-01-21
Supplement: Supp_Fig1.pdf [file Supp_Fig1.pdf]

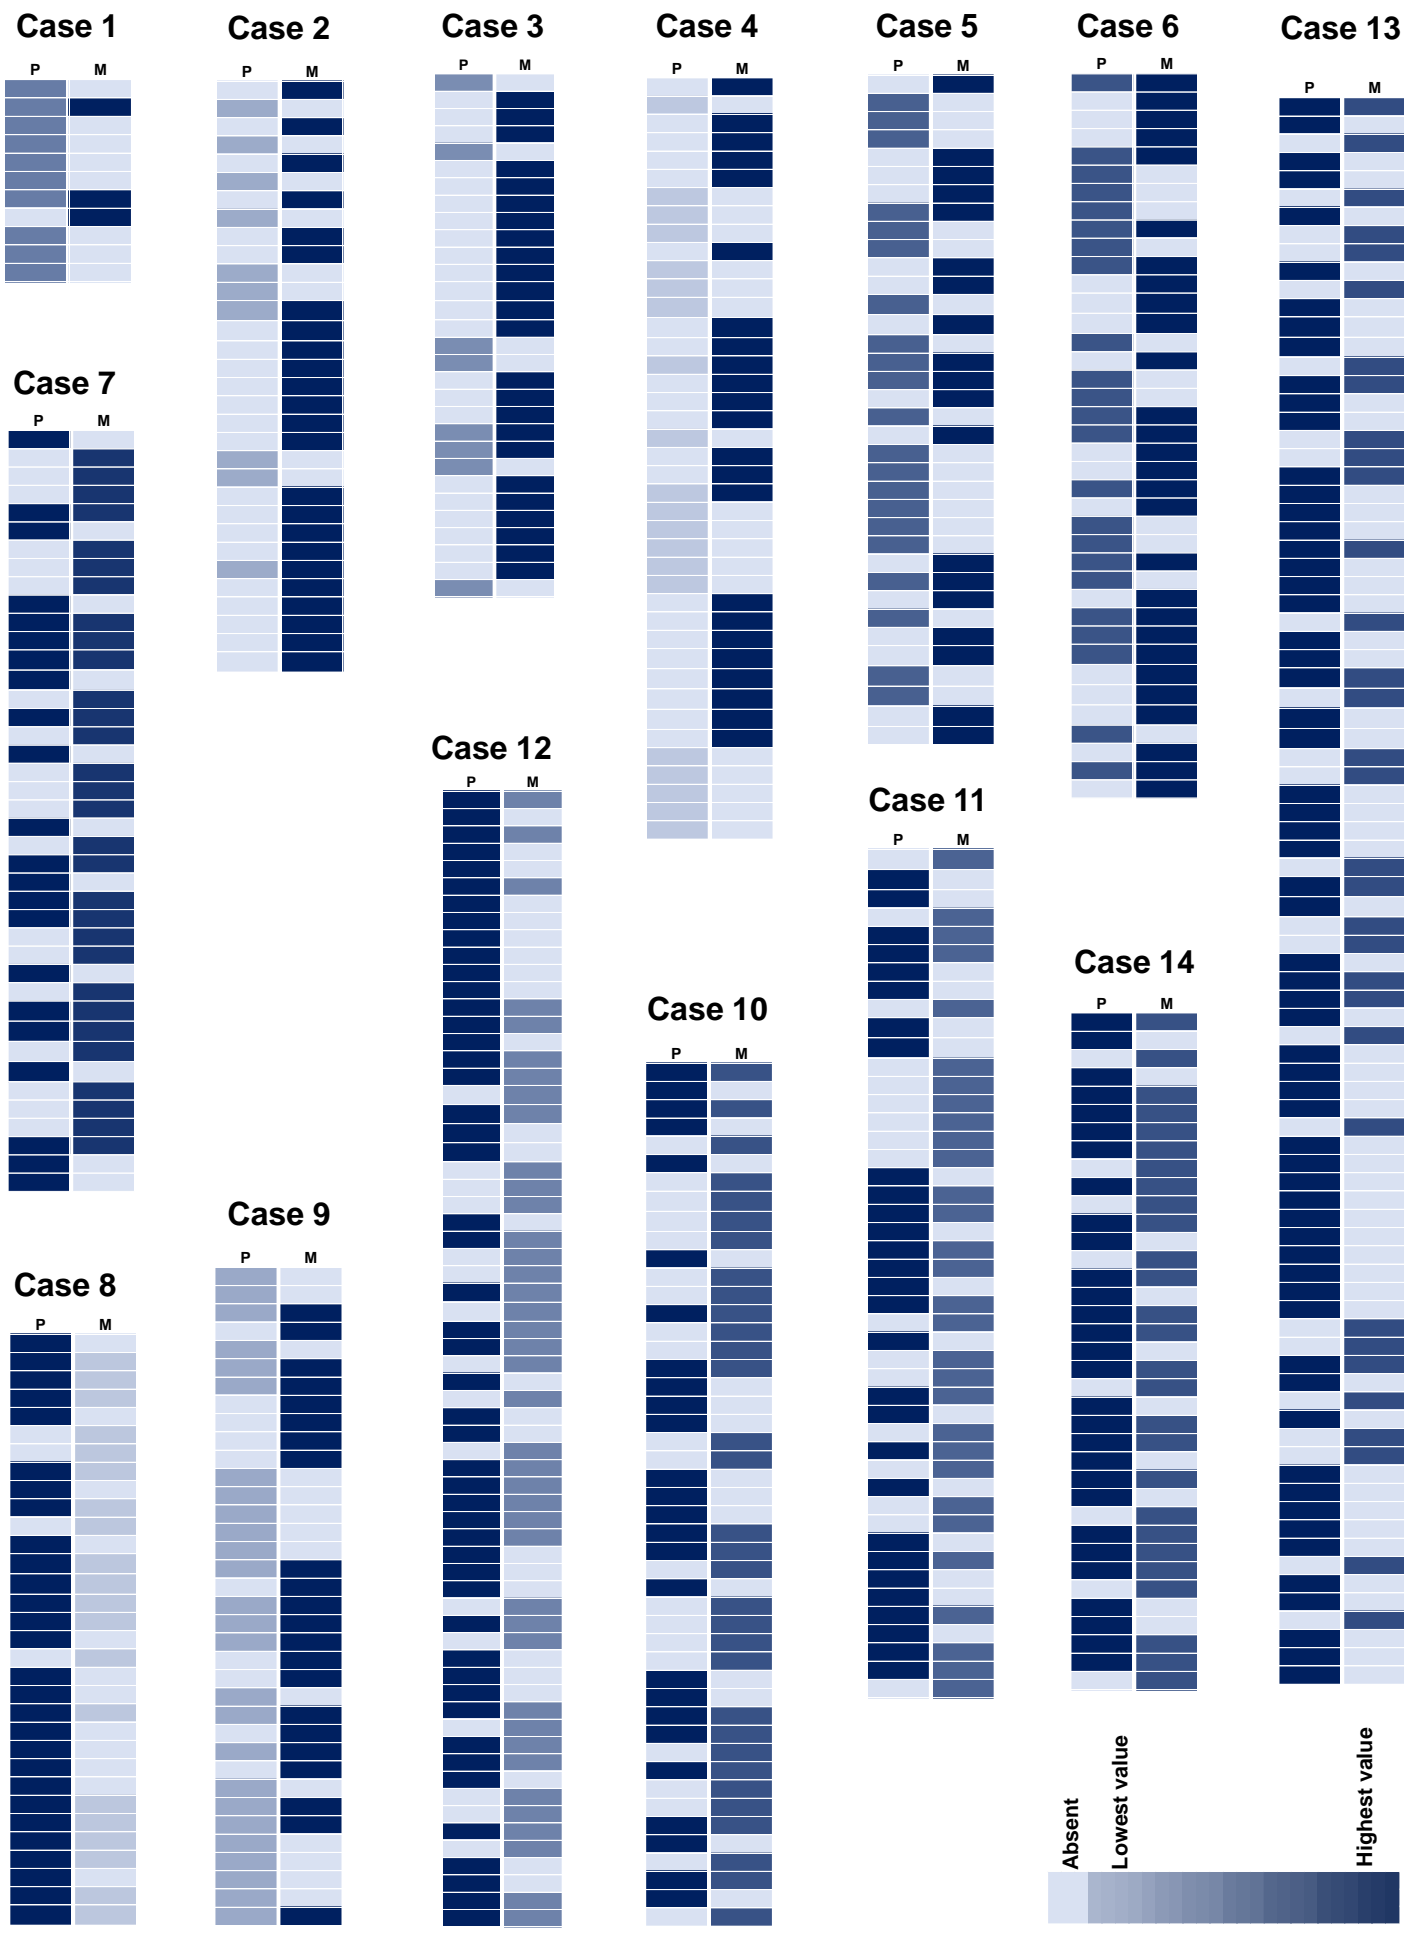

**Supplementary Fig. 1: Somatic mutations in primary tumor and their metastatic lesions.** Heatmaps show the variant allele fraction (VAF) of somatic mutations based on presence or absence as per the color key.
