# Supplementary material for: Whole-Exome Sequencing of Matched Primary and Metastatic Papillary Thyroid Cancer
Source: PubMed Central journal article supplement — Thyroid. 2020 Jan 21;30(1):42–56. doi: 10.1089/thy.2019.0052 (PMC6983753; doi:10.1089/thy.2019.0052), 2020-01-21
Supplement: Supp_Fig3.pdf [file Supp_Fig3.pdf]

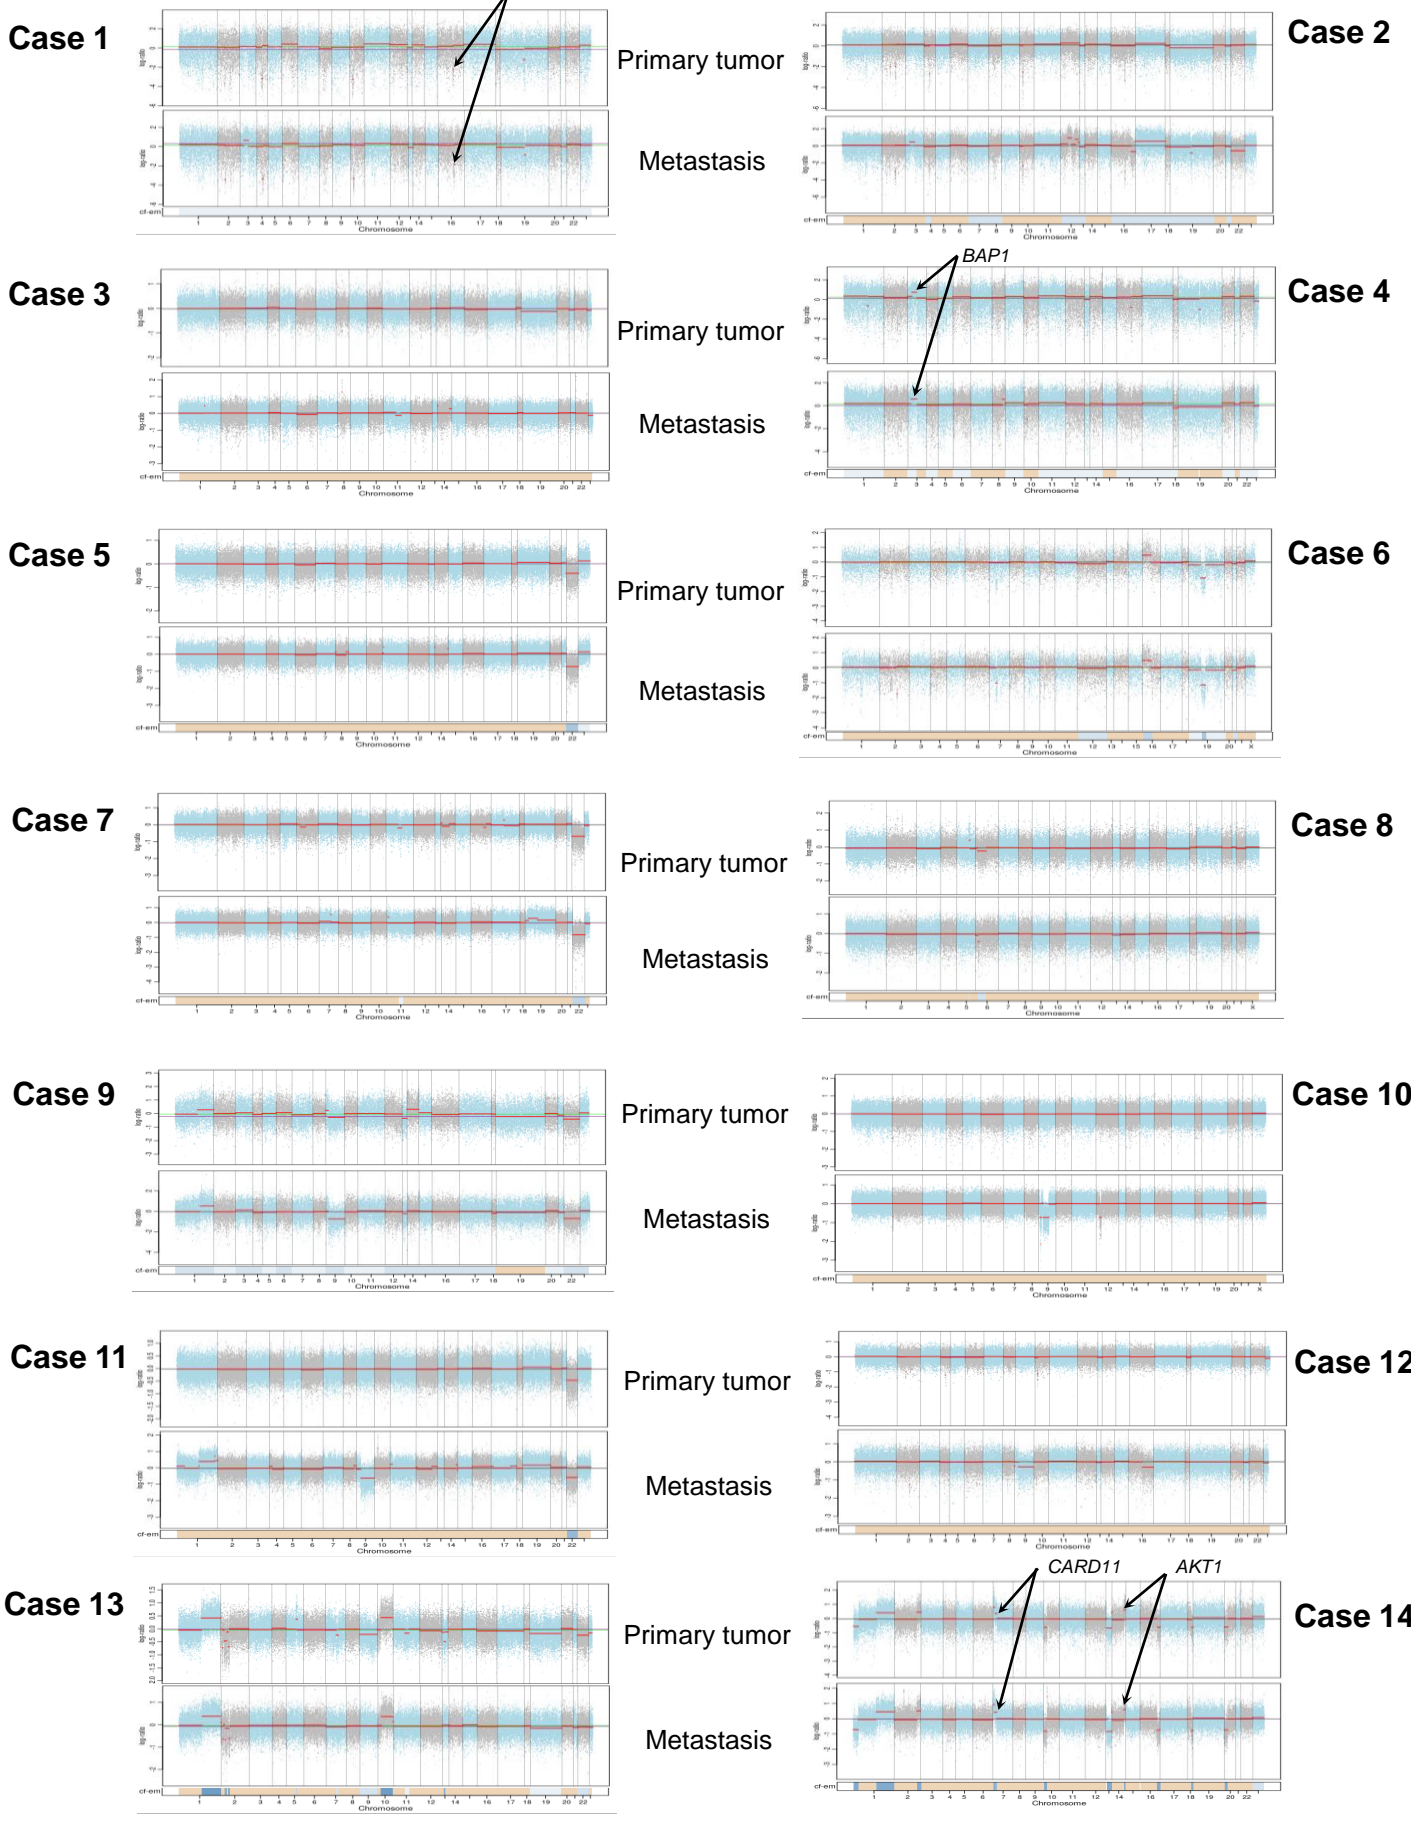

**Supplementary Fig. 3: Genome plots of the primary tumor and their metastatic lesion.** Segmented Log<sub>2</sub> ratios on y-axis were plotted according to their genomic positions on x-axis. Alternating blue and grey color demarcate the chromosomes. Black arrows indicates the shared focal amplifications and homozygous deletions in both lesions.
