# Supplementary material for: Whole-Exome Sequencing of Matched Primary and Metastatic Papillary Thyroid Cancer
Source: PubMed Central journal article supplement — Thyroid. 2020 Jan 21;30(1):42–56. doi: 10.1089/thy.2019.0052 (PMC6983753; doi:10.1089/thy.2019.0052), 2020-01-21
Supplement: Supp_Fig5.pdf [file Supp_Fig5.pdf]

Supplementary Fig. 5

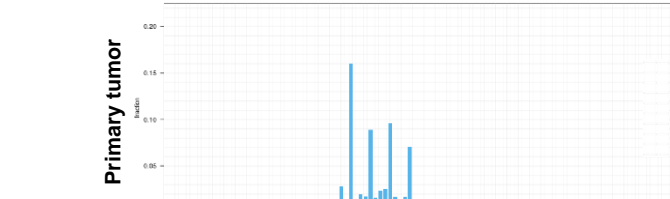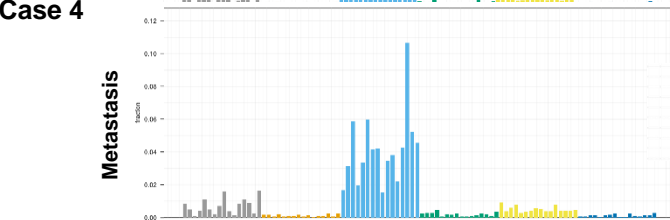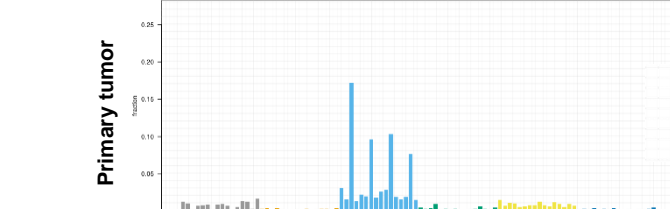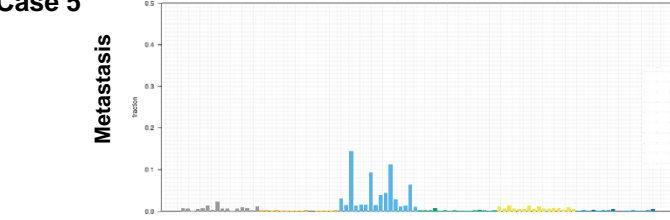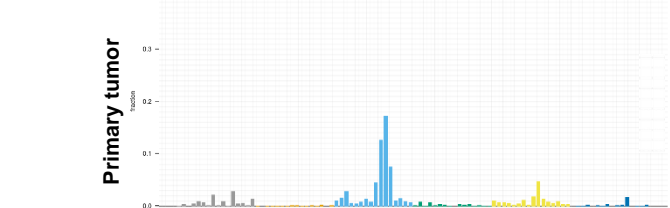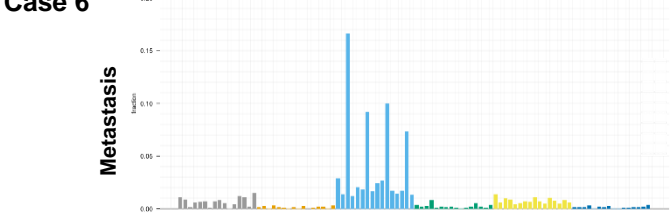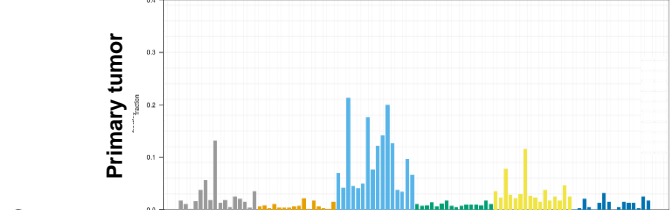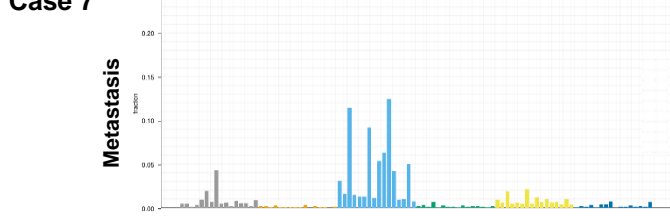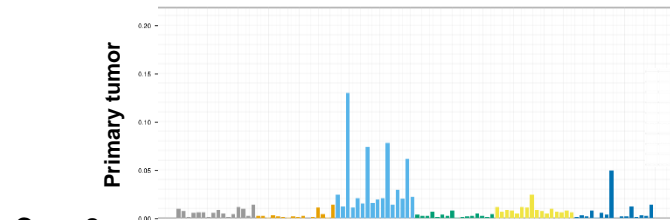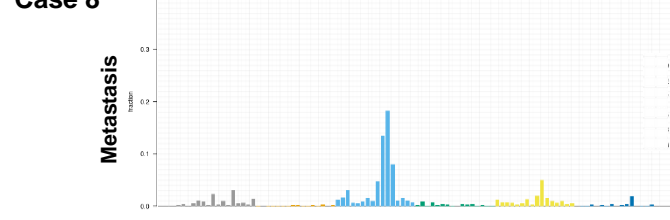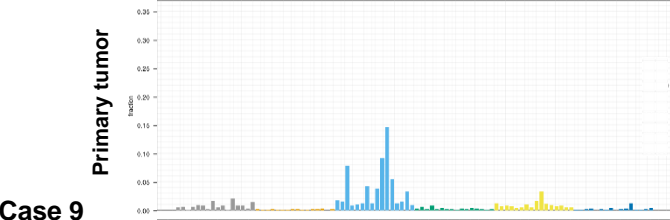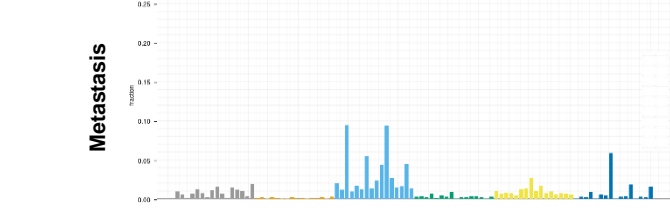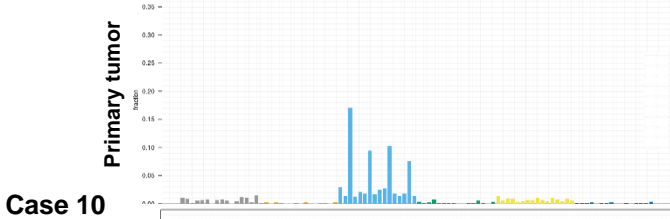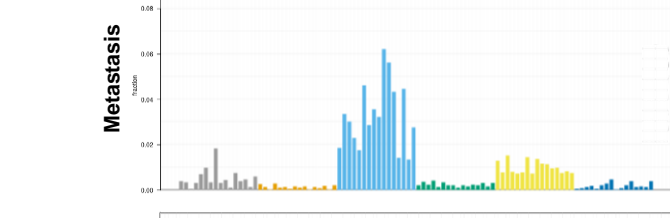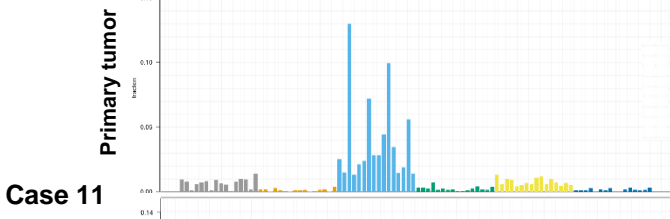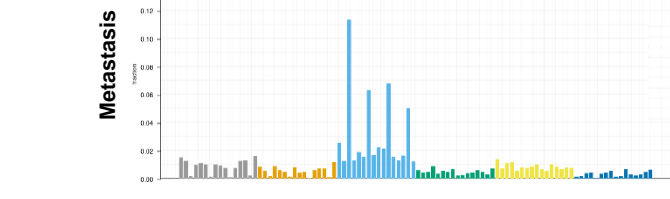

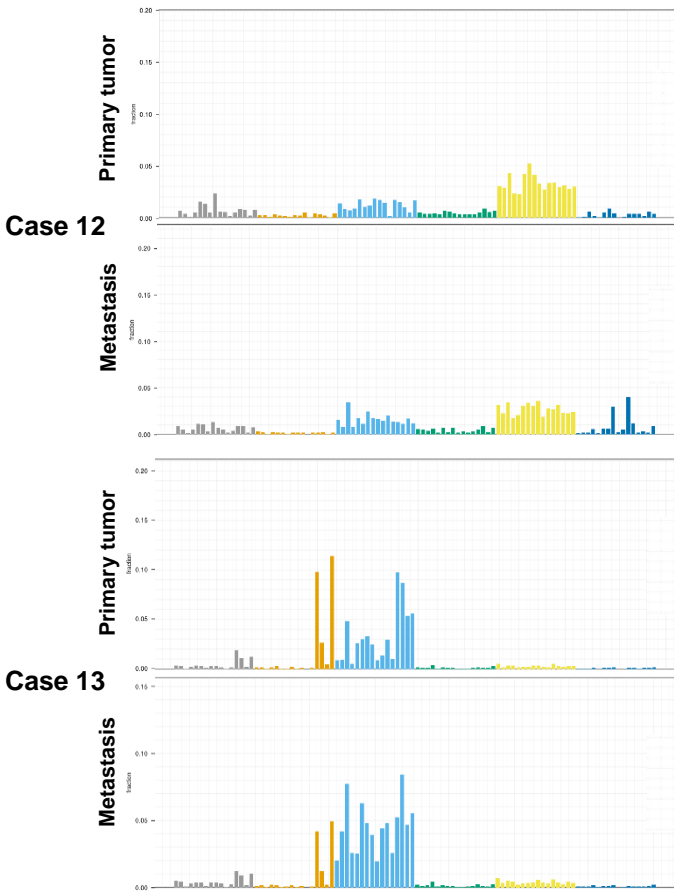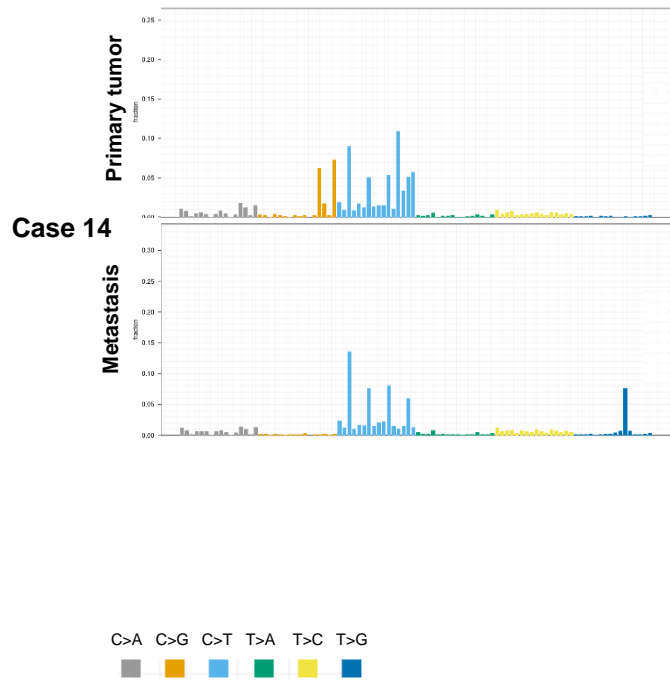

**Supplementary Fig. 5: Mutational signatures in primary tumor and metastasis.** Plots represents the mutational signatures of the mutations in the primary tumor and their metastatic tissues. In each panel (primary tumor as well as metastasis) the colored bar plot illustrates each mutational signature according to the 96 substitution classification defined by the substitution classes (C>A, C>G, C>T, T>A, T>C and T>G). Color of the bars represents substitution class.
