# Supplementary material for: Whole-Exome Sequencing of Matched Primary and Metastatic Papillary Thyroid Cancer
Source: PubMed Central journal article supplement — Thyroid. 2020 Jan 21;30(1):42–56. doi: 10.1089/thy.2019.0052 (PMC6983753; doi:10.1089/thy.2019.0052), 2020-01-21
Supplement: Supp_Table1.pdf [file Supp_Table1.pdf]

## Supplementary Data

SUPPLEMENTARY TABLE S1. CLINICOPATHOLOGICAL CHARACTERISTICS OF PAPILLARY THYROID CARCINOMA CASES WITH DISTANT METASTASIS INCLUDED IN THE STUDY

| Case ID | Age (years) | Sex    | Primary tumor |         |         |                          |                      | Metastasis |                             |                                  |                                 | Treatment                                      |                                                                                       |                                            |
|---------|-------------|--------|---------------|---------|---------|--------------------------|----------------------|------------|-----------------------------|----------------------------------|---------------------------------|------------------------------------------------|---------------------------------------------------------------------------------------|--------------------------------------------|
|         |             |        | T stage       | N stage | M stage | Extrathyroidal extension | Histological subtype | Stage      | Sites of distant metastasis | Distant metastatic site biopsied | Diameter of the metastasis (cm) | M1 developing after radioactive iodine therapy | Interval between radioactive iodine therapy and development of metastasis (in months) | Disease-free survival duration (in months) |
| 1       | 20          | Female | T4            | N1      | M1      | Present                  | Follicular variant   | II         | Bone, lung                  | Bone                             | 2.5                             | No                                             | —                                                                                     | 37                                         |
| 2       | 39          | Female | T1            | N0      | M1      | Absent                   | Classical variant    | II         | Bone                        | Bone                             | 8.5                             | Yes                                            | 37                                                                                    | 37                                         |
| 3       | 45          | Male   | T4            | N1      | M1      | Absent                   | Follicular variant   | IV         | Bone                        | Bone                             | 4.5                             | No                                             | —                                                                                     | 8                                          |
| 4       | 58          | Male   | T3            | N0      | M1      | NA                       | Follicular variant   | IV         | Bone                        | Bone                             | 5.5                             | No                                             | —                                                                                     | 40                                         |
| 5       | 62          | Female | T2            | N0      | M1      | NA                       | Follicular variant   | IV         | Bone                        | Bone                             | 2.9                             | Yes                                            | 155                                                                                   | 47                                         |
| 6       | 57          | Female | T3            | N0      | M1      | Present                  | Follicular variant   | IV         | Lung, right frontal bone    | Lung                             | 4.0                             | No                                             | —                                                                                     | 6                                          |
| 7       | 52          | Male   | T3            | N0      | M1      | Present                  | Follicular variant   | IV         | Bone                        | Bone                             | 6                               | No                                             | —                                                                                     | 6                                          |
| 8       | 67          | Female | T3            | N1      | M1      | Present                  | Mixed variants       | IV         | Bone                        | Bone                             | 14                              | No                                             | —                                                                                     | 21 (deceased)                              |
| 9       | 51          | Female | NA            | N1      | M1      | NA                       | Classical variant    | IV         | Lung, adrenal               | Lung                             | 2.8                             | Yes                                            | 32                                                                                    | 32                                         |
| 10      | 70          | Female | T3            | N0      | M1      | Absent                   | Follicular variant   | IV         | Brain                       | Brain                            | 7.0                             | No                                             | —                                                                                     | 8 (deceased)                               |
| 11      | 38          | Female | T3            | N0      | M1      | Present                  | Tall cell variant    | II         | Bone, lung                  | Bone                             | 2.0                             | Yes                                            | 191                                                                                   | 56                                         |
| 12      | 73          | Male   | T3            | N1      | M1      | Present                  | Classical variant    | IV         | Lung                        | Lung                             | 3.0                             | No                                             | —                                                                                     | 12 (deceased)                              |
| 13      | 42          | Male   | NA            | N1      | M1      | Absent                   | Tall cell variant    | II         | Kidney                      | Kidney                           | 0.5                             | Yes                                            | 18                                                                                    | 18                                         |
| 14      | 30          | Female | T2            | N1      | M1      | NA                       | Follicular variant   | II         | Bone, lung                  | Bone                             | 6                               | No                                             | —                                                                                     | 11                                         |

NA, not available.
