# Supplementary material for: Whole-Exome Sequencing of Matched Primary and Metastatic Papillary Thyroid Cancer
Source: PubMed Central journal article supplement — Thyroid. 2020 Jan 21;30(1):42–56. doi: 10.1089/thy.2019.0052 (PMC6983753; doi:10.1089/thy.2019.0052), 2020-01-21
Supplement: Supp_Table2-Table7.pdf [file Supp_Table2-Table7.pdf]

SUPPLEMENTARY TABLE S2. ASSOCIATION OF NUMBER OF MUTATIONS WITH CLINICOPATHOLOGICAL PARAMETERS

|                          | No. of mutations,<br>median (range) | p     |
|--------------------------|-------------------------------------|-------|
| Age (years)              |                                     |       |
| ≥45                      | 48 (32–89)                          | 0.797 |
| <45                      | 56 (13–95)                          |       |
| Sex                      |                                     |       |
| Female                   | 48 (13–59)                          | 0.518 |
| Male                     | 52 (32–95)                          |       |
| Histology                |                                     |       |
| Classical variant        | 48 (34–88)                          | 0.127 |
| Follicular variant       | 47 (13–58)                          |       |
| Tall cell variant        | 77 (59–95)                          |       |
| Extrathyroidal extension |                                     |       |
| Present                  | 51.5 (13–89)                        | 1.000 |
| Absent                   | 46 (32–95)                          |       |
| Stage                    |                                     |       |
| II                       | 56 (13–95)                          | 0.797 |
| IV                       | 48 (32–89)                          |       |

SUPPLEMENTARY TABLE S7. PATHWAY ANALYSIS USING G:PROFILER AND INGENUITY PATHWAY ANALYSIS

| <i>Ingenuity Pathway Analysis of the genes restricted to metastasis</i>                                                                      |                                                            |                         |           |
|----------------------------------------------------------------------------------------------------------------------------------------------|------------------------------------------------------------|-------------------------|-----------|
| No.                                                                                                                                          | <i>Ingenuity canonical pathways</i>                        | <i>Genes</i>            | p         |
| 1                                                                                                                                            | Nonsmall cell lung cancer signaling                        | TP53, NRAS, HRAS, SIN3A | <0.0001   |
| 2                                                                                                                                            | Bladder cancer signaling                                   | TP53, NRAS, HRAS, SIN3A | <0.0001   |
| 3                                                                                                                                            | Prostate cancer signaling                                  | TP53, NRAS, HRAS, SIN3A | <0.0001   |
| 4                                                                                                                                            | Chronic myeloid leukemia signaling                         | TP53, NRAS, HRAS, SIN3A | <0.0001   |
| 5                                                                                                                                            | Glioma signaling                                           | TP53, NRAS, HRAS, SIN3A | <0.0001   |
| 6                                                                                                                                            | DNA methylation and transcriptional repression signaling   | CHD4, RBBP7, SIN3A      | <0.0001   |
| 7                                                                                                                                            | Ovarian cancer signaling                                   | TP53, NRAS, HRAS, SIN3A | <0.0001   |
| 8                                                                                                                                            | Thyroid cancer signaling                                   | TP53, NRAS, HRAS        | <0.0001   |
| 9                                                                                                                                            | UVC-induced MAPK signaling                                 | TP53, NRAS, HRAS        | <0.0001   |
| 10                                                                                                                                           | Cancer drug resistance by drug efflux                      | TP53, NRAS, HRAS        | <0.0001   |
| <i>Ingenuity Pathway Analysis of the genes restricted to metastasis (excluding the genes present with &gt;1% frequency in TCGA thyroid)</i>  |                                                            |                         |           |
| No.                                                                                                                                          | <i>Ingenuity canonical pathways</i>                        | <i>Genes</i>            | p         |
| 1                                                                                                                                            | DNA methylation and transcriptional repression signaling   | CHD4, RBBP7, SIN3A      | <0.0001   |
| 2                                                                                                                                            | L-Dopachrome biosynthesis                                  | TYR                     | 0.0004074 |
| 3                                                                                                                                            | Biotin-carboxyl carrier protein assembly                   | ACACB                   | 0.0012303 |
| 4                                                                                                                                            | Adipogenesis pathway                                       | RBBP7, SIN3A            | 0.0012882 |
| 5                                                                                                                                            | Eumelanin biosynthesis                                     | TYR                     | 0.0020417 |
| 6                                                                                                                                            | Transcriptional regulatory network in embryonic stem cells | EOMES                   | 0.0218776 |
| 7                                                                                                                                            | Nur77 signaling in T lymphocytes                           | SIN3A                   | 0.0239883 |
| 8                                                                                                                                            | Cell cycle: G1/S checkpoint regulation                     | SIN3A                   | 0.0269153 |
| 9                                                                                                                                            | Nonsmall cell lung cancer signaling                        | SIN3A                   | 0.0309030 |
| 10                                                                                                                                           | Cyclins and cell cycle regulation                          | SIN3A                   | 0.0331131 |
| <i>g:Profiler pathway analysis of the genes restricted to metastasis (excluding the genes present with &gt;1% frequency in TCGA thyroid)</i> |                                                            |                         |           |
| No.                                                                                                                                          | <i>g:Profiler pathway</i>                                  | <i>Genes</i>            | p         |
| 1                                                                                                                                            | Epigenetic regulation of gene expression                   | CHD4, RBBP7, SIN3A      | 0.0269    |
| 2                                                                                                                                            | Regulation of TP53 activity through acetylation            | CHD4, RBBP7             | 0.0411    |

MAPK, mitogen-activated protein kinase; TCGA, The Cancer Genome Atlas; UVC, ultraviolet light short wavelength.
